# Supplementary material for: The methylation landscape of giga-genome and the epigenetic timer of age in Chinese pine
Source: PubMed Central journal article supplement (PMC10082083; doi:10.1038/s41467-023-37684-6), 2023-04-07
Supplement: 41467_2023_37684_MOESM2_ESM.pdf [file 41467_2023_37684_MOESM2_ESM.pdf]

## Description of Additional Supplementary Files

File Name: Supplementary Data 1

Description: CG DMR between 2y and 14y

File Name: Supplementary Data 2

Description: CHG DMR between 2y and 14y

File Name: Supplementary Data 3

Description: CHH DMR between 2y and 14y

File Name: Supplementary Data 4

Description: CG DMR between 2y and 35y

File Name: Supplementary Data 5

Description: CHG DMR between 2y and 35y

File Name: Supplementary Data 6

Description: CHH DMR between 2y and 35y

File Name: Supplementary Data 7

Description: CG DMR between 5y and 35y

File Name: Supplementary Data 8

Description: CHG DMR between 5y and 35y

File Name: Supplementary Data 9

Description: CHH DMR between 5y and 35y

File Name: Supplementary Data 10

Description: The DMRs within gene body or upstream and downstream 2Kb regions for the age-related genes
